# Supplementary material
Source: MDPI journal article supplement (https://www.mdpi.com/search?q=molecules-20-19881)

# Supplementary Materials: OSU-6: A Highly Efficient, Metal-Free, Heterogeneous Catalyst for the Click Synthesis of 5-Benzyl and 5-Aryl-1*H*-tetrazoles

Baskar Nammalwar, Nagendra Prasad Muddala, Rajasekar Pitchimani and Richard A. Bunce

## 5-Benzyl-1*H*-tetrazole (2a)

NP-1H-simplebenzyltetrazole-01-14-15.10.fid  
PROTON DMSO (C:\NMRDATA\ muddala 11

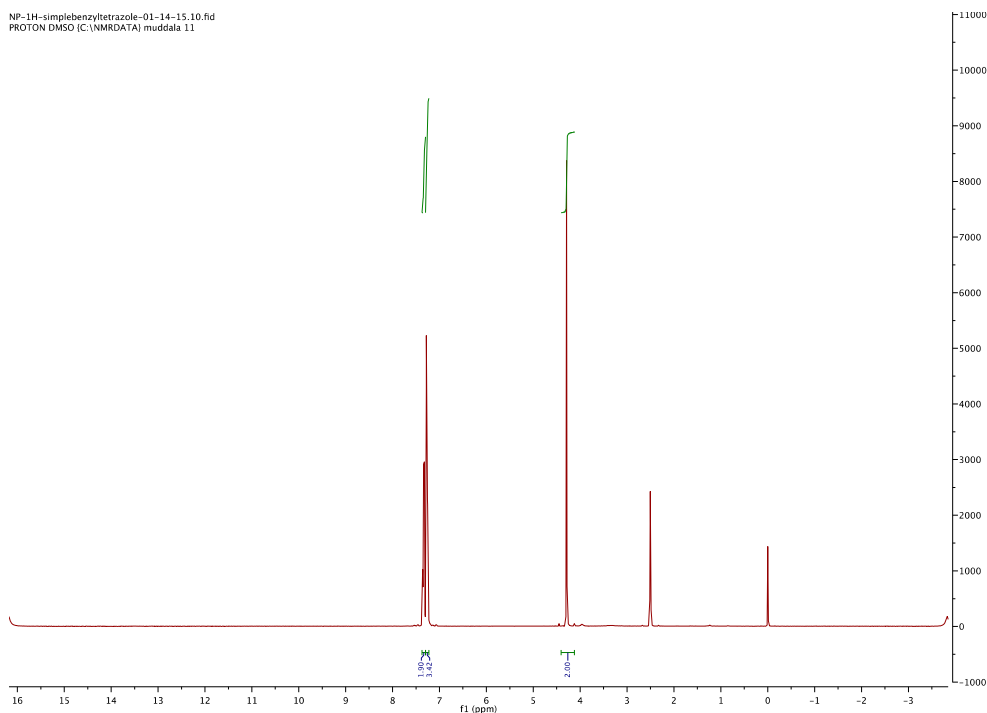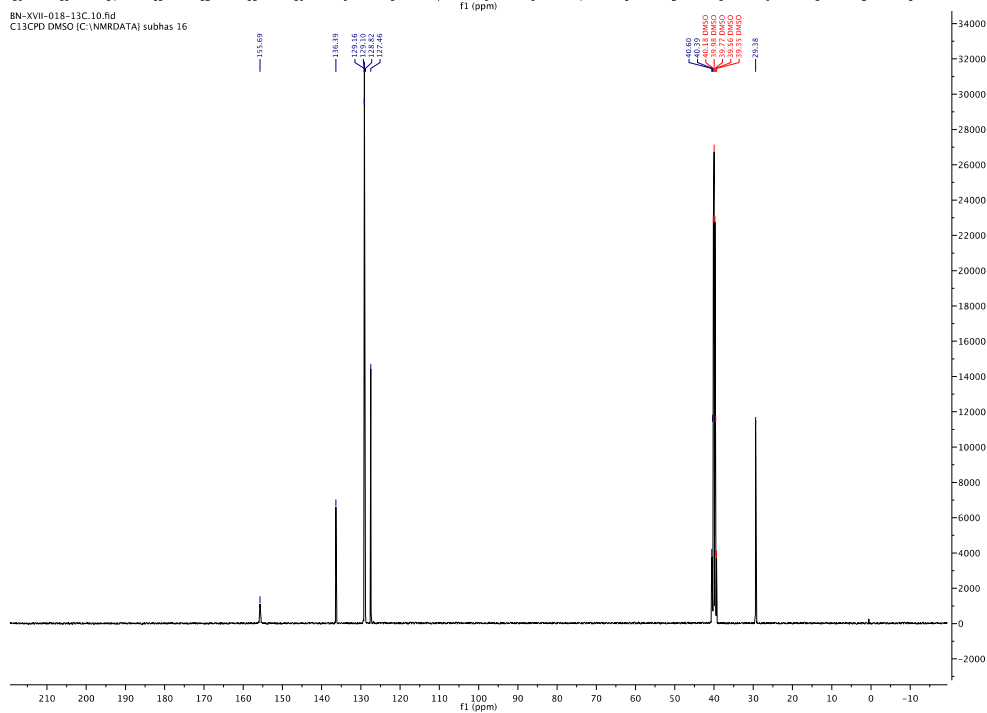

# 5-(4-Methylbenzyl)-1H-tetrazole (2b)

BN-XVIII-05-1H.10.fid  
PROTON DMSO (C:\NMRDATA) subhas 31

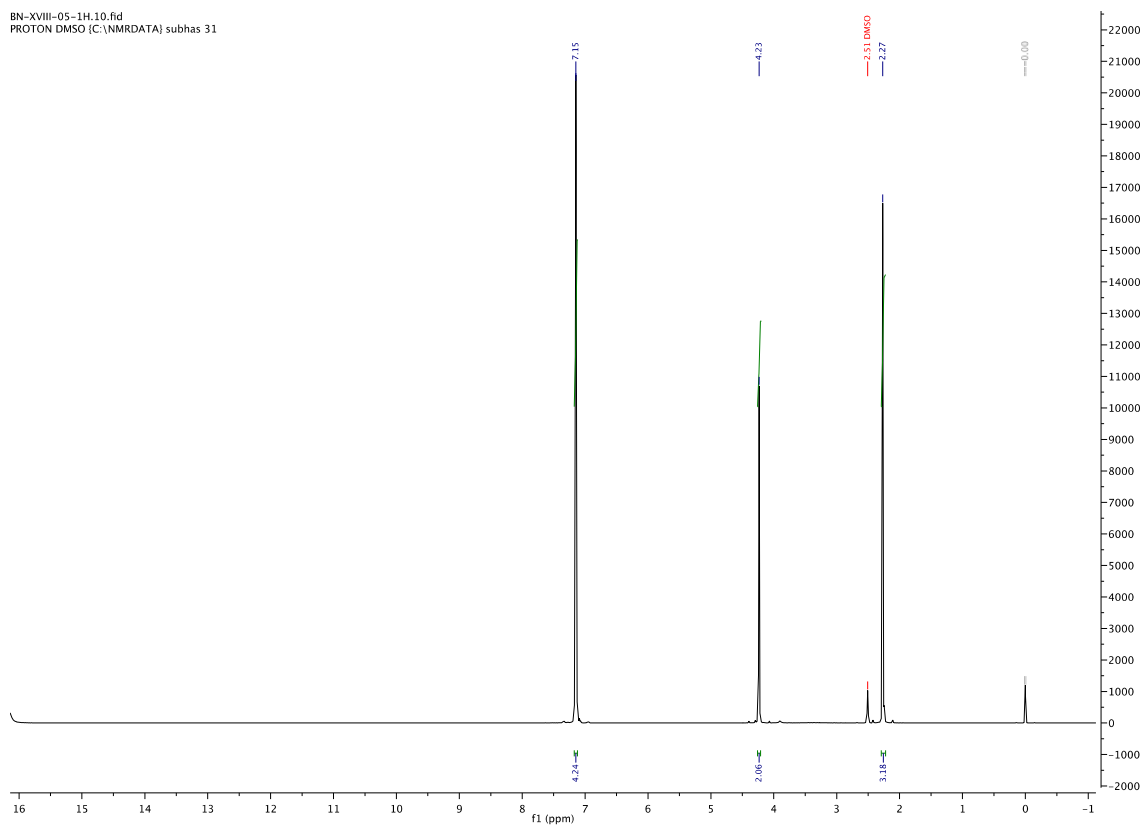

BN-XVIII-05-13C.10.fid  
C13CPD DMSO (C:\NMRDATA) subhas 31

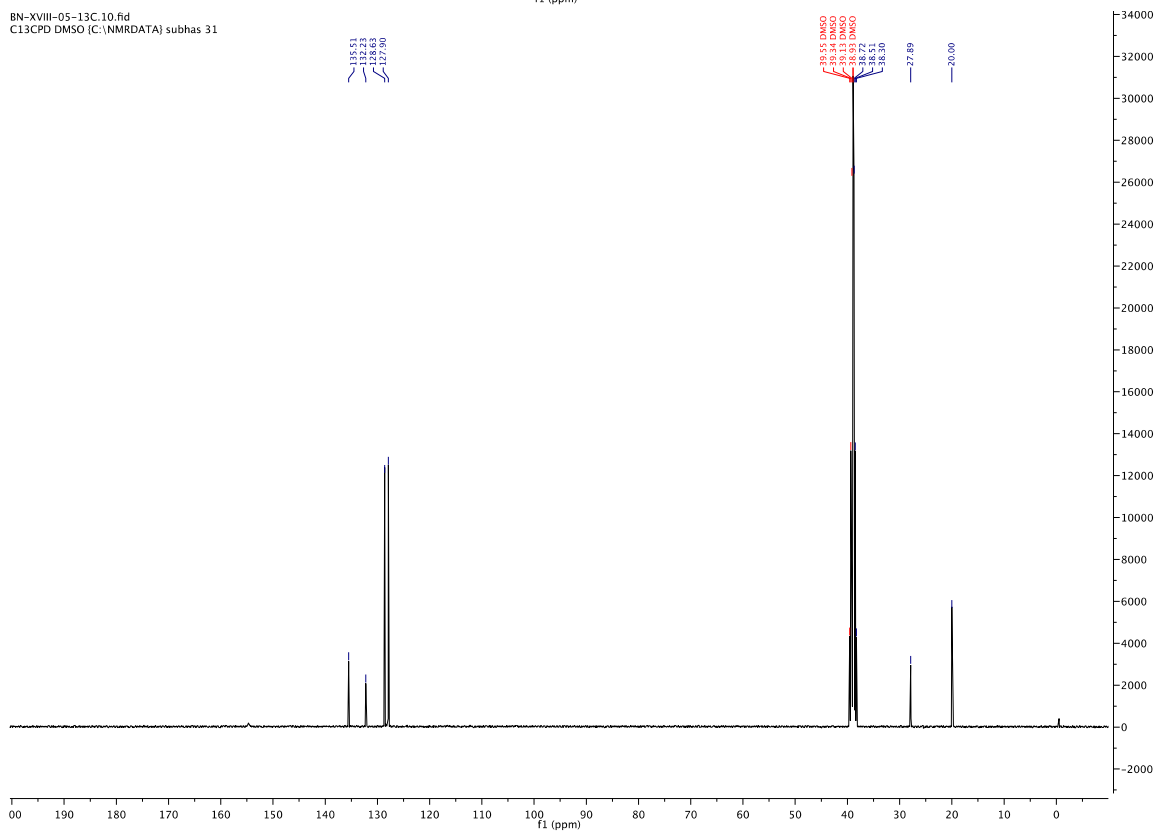

# 5-(4-Methoxybenzyl)-1H-tetrazole (2c)

BN-XVIII-04-1H.10.fid  
PROTON DMSO (C:\NMRDATA) baskar 27

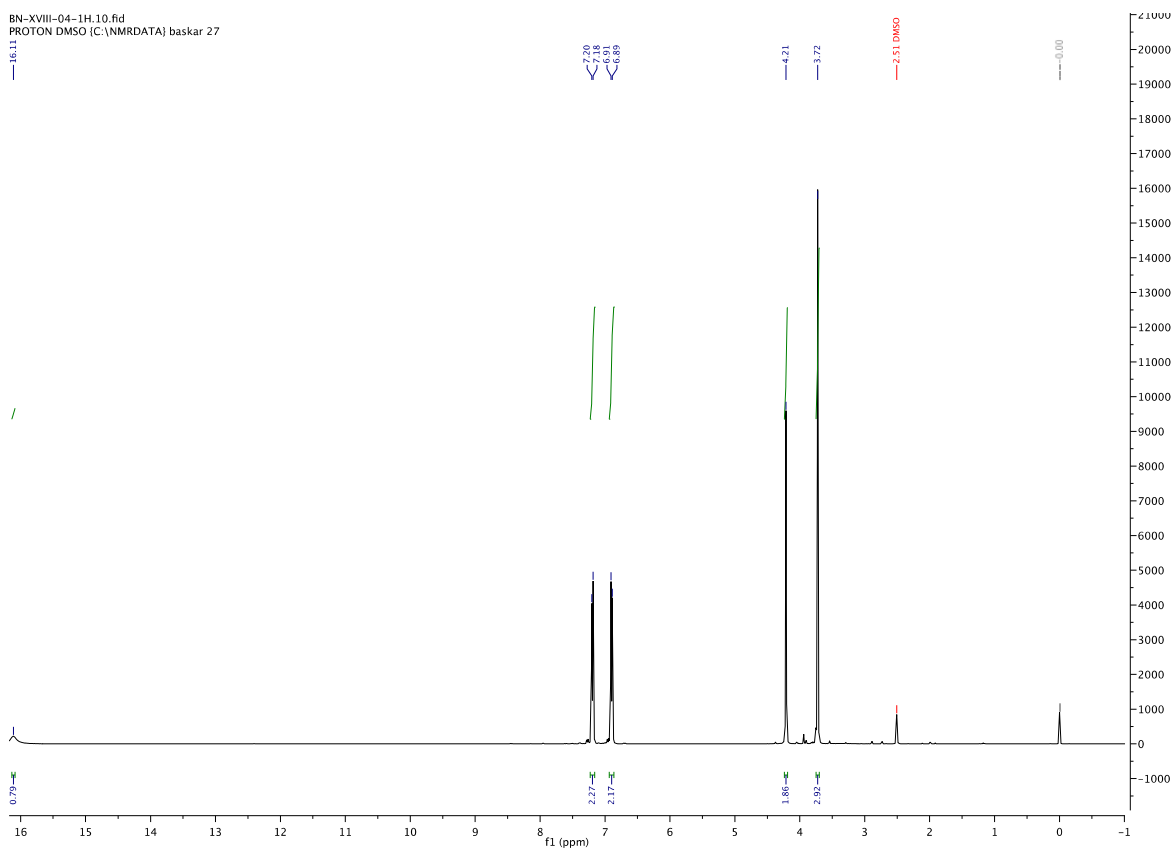

BN-XVIII-04-13C.10.fid  
C13CPD DMSO (C:\NMRDATA) baskar 27

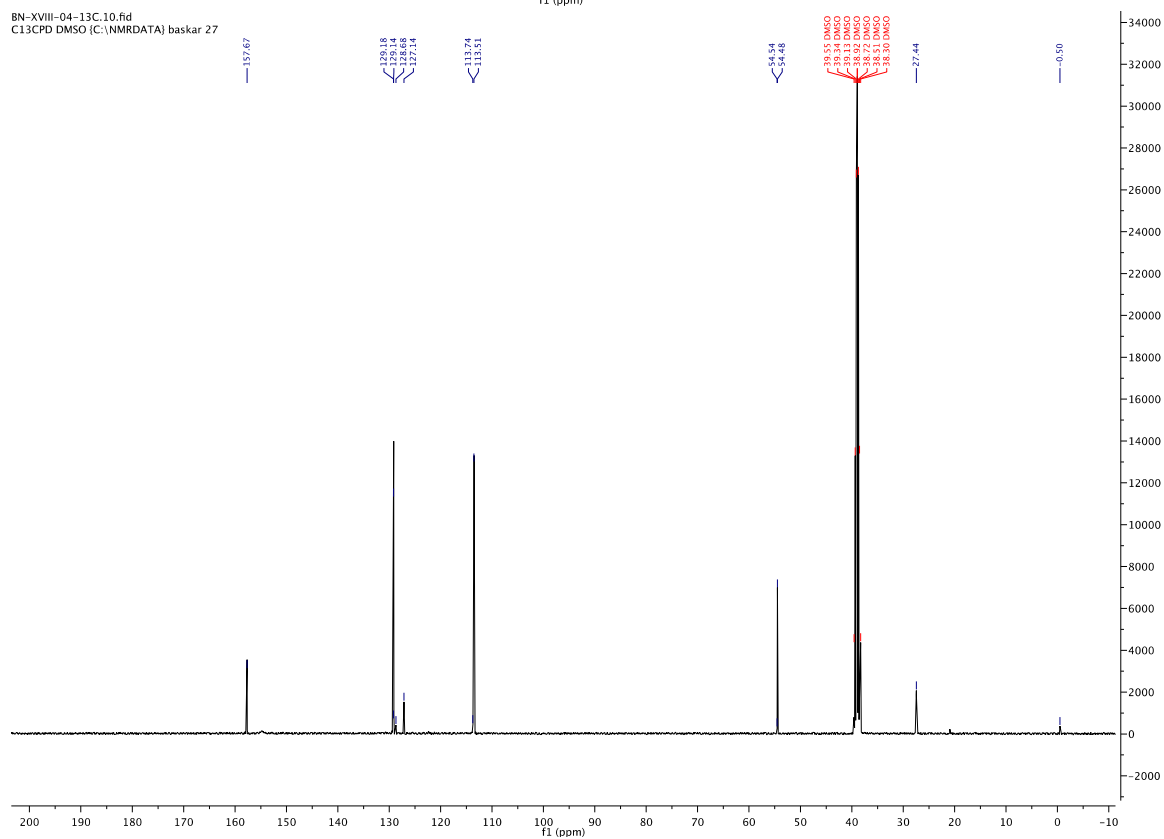

# 5-(4-Chlorobenzyl)-1H-tetrazole (2d)

BN-XVIII-07-1H.10.fid  
PROTON DMSO (C:\NMRDATA) subhas 36

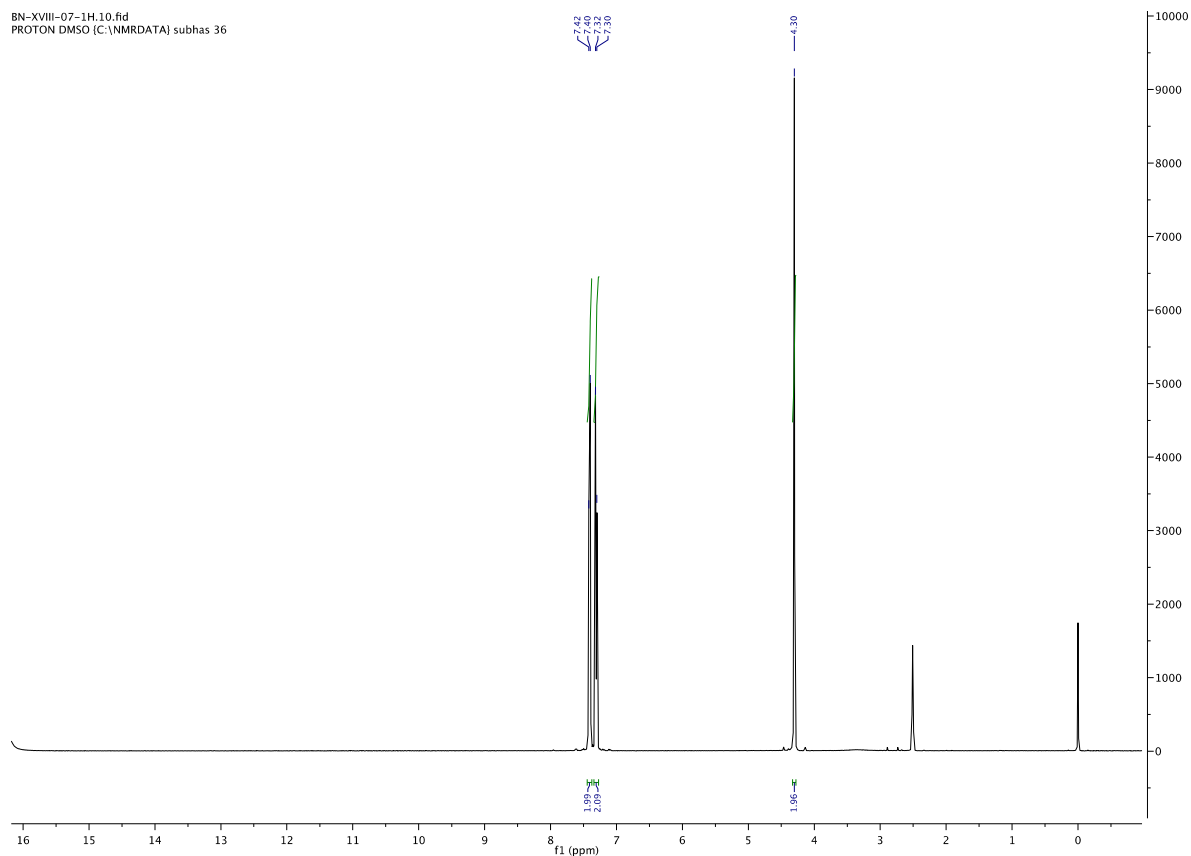

BN-XVIII-07-13C.10.fid  
C13CPD DMSO (C:\NMRDATA) subhas 36

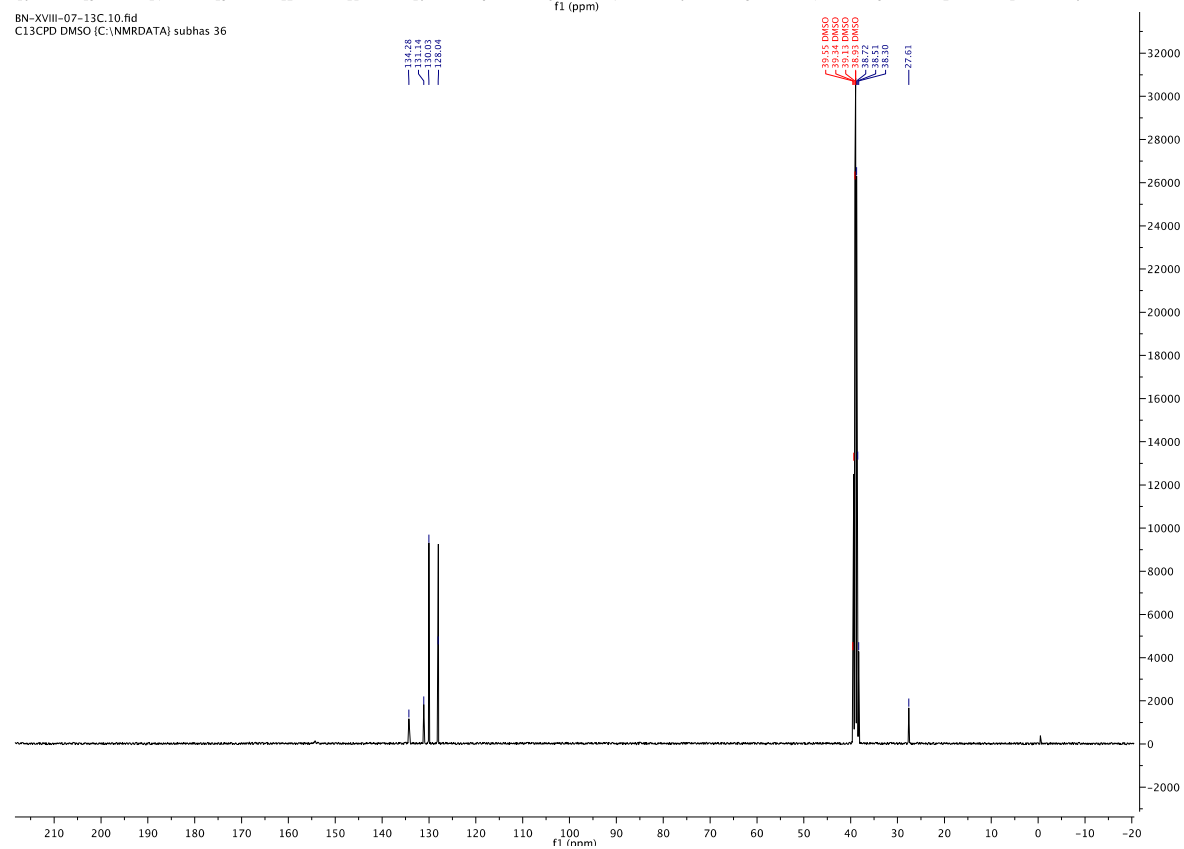

# 5-(4-Fluorobenzyl)-1H-tetrazole (2e)

BN-XVII-014-1H.10.fid  
PROTON DMSO (C:\NMRDATA) subhas 37

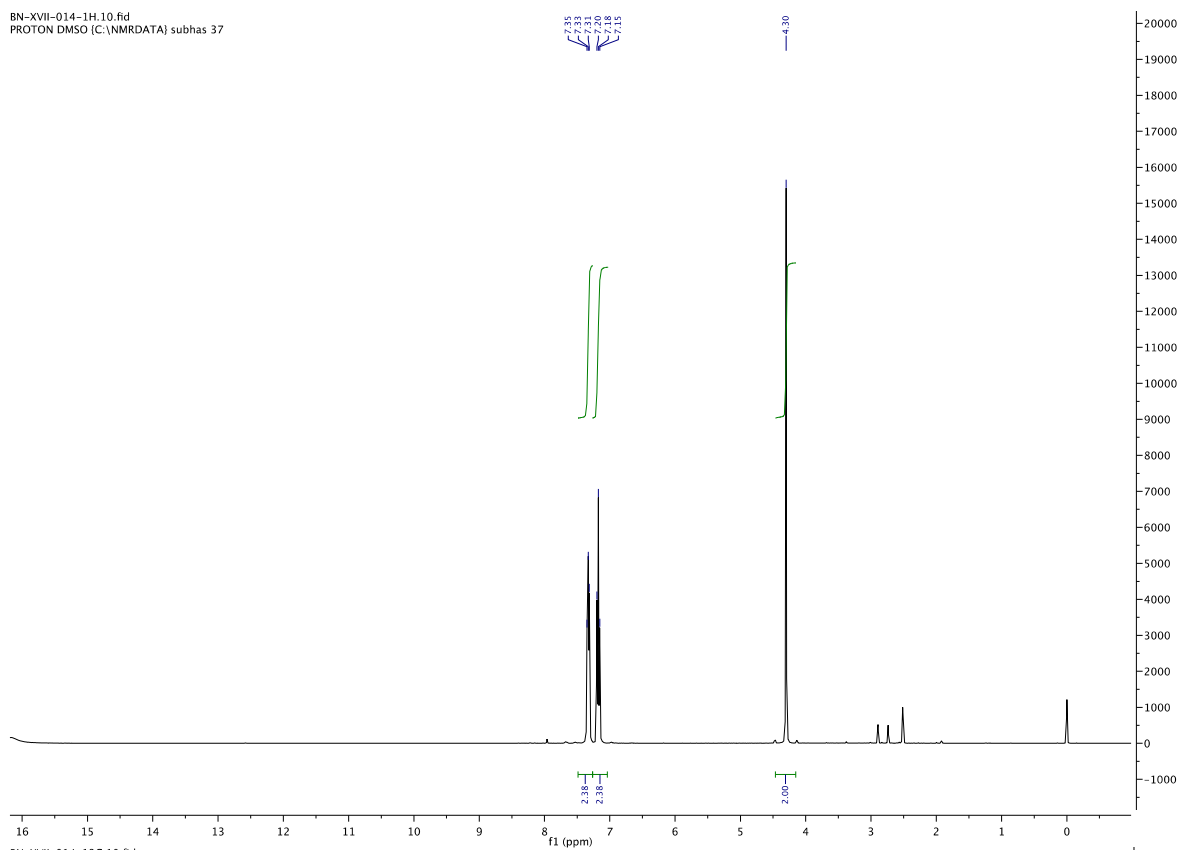

BN-XVII-014-13C.10.fid  
C13CPD DMSO (C:\NMRDATA) subhas 37

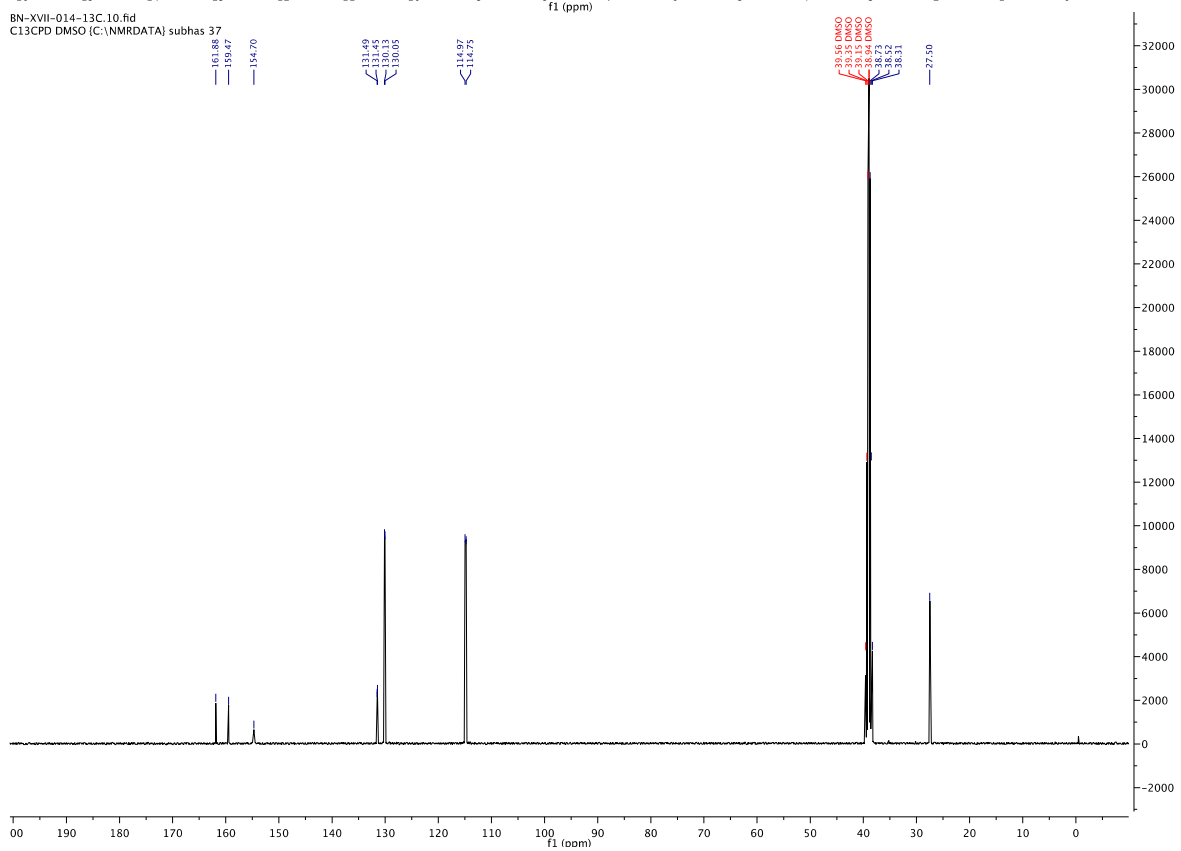

# 5-Phenyl-1H-tetrazole (2f)

BN-XVIII-012-1H.10.fid  
PROTON DMSO (C:\NMRDATA) baskar.29

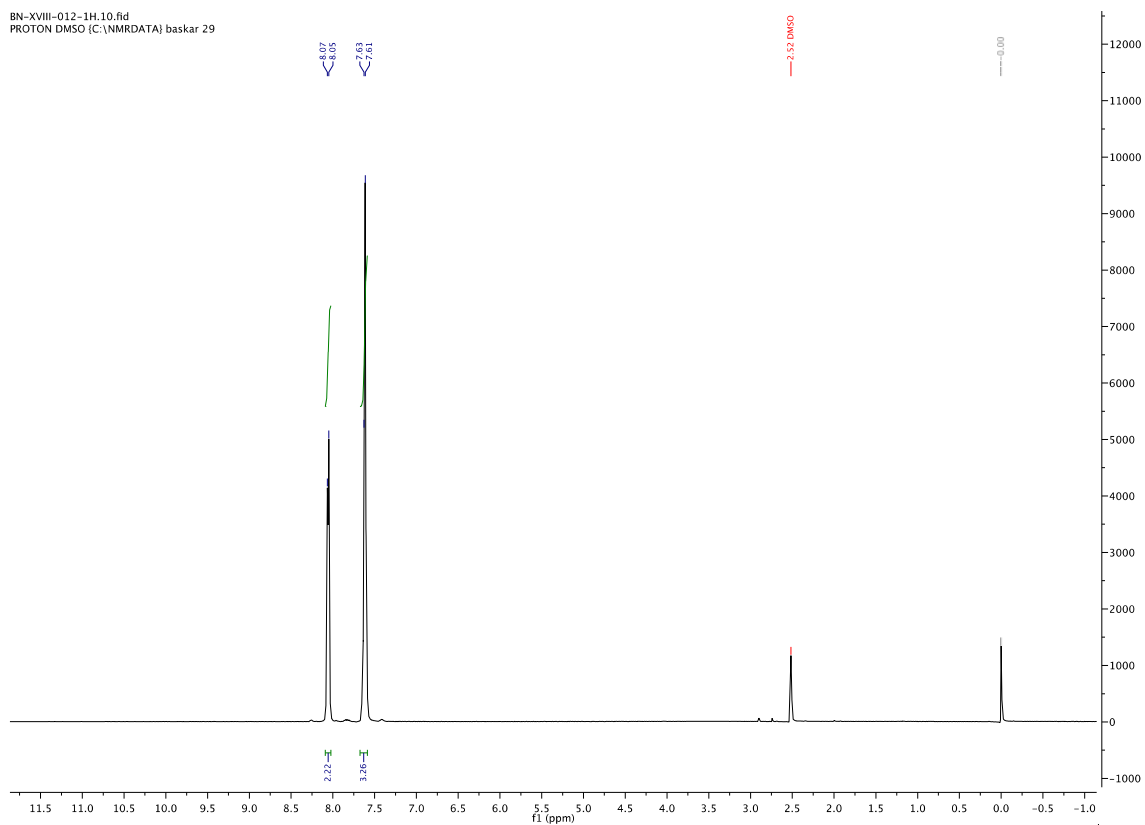

BN-XVIII-012-13C.10.fid  
C13CPD DMSO (C:\NMRDATA) baskar.29

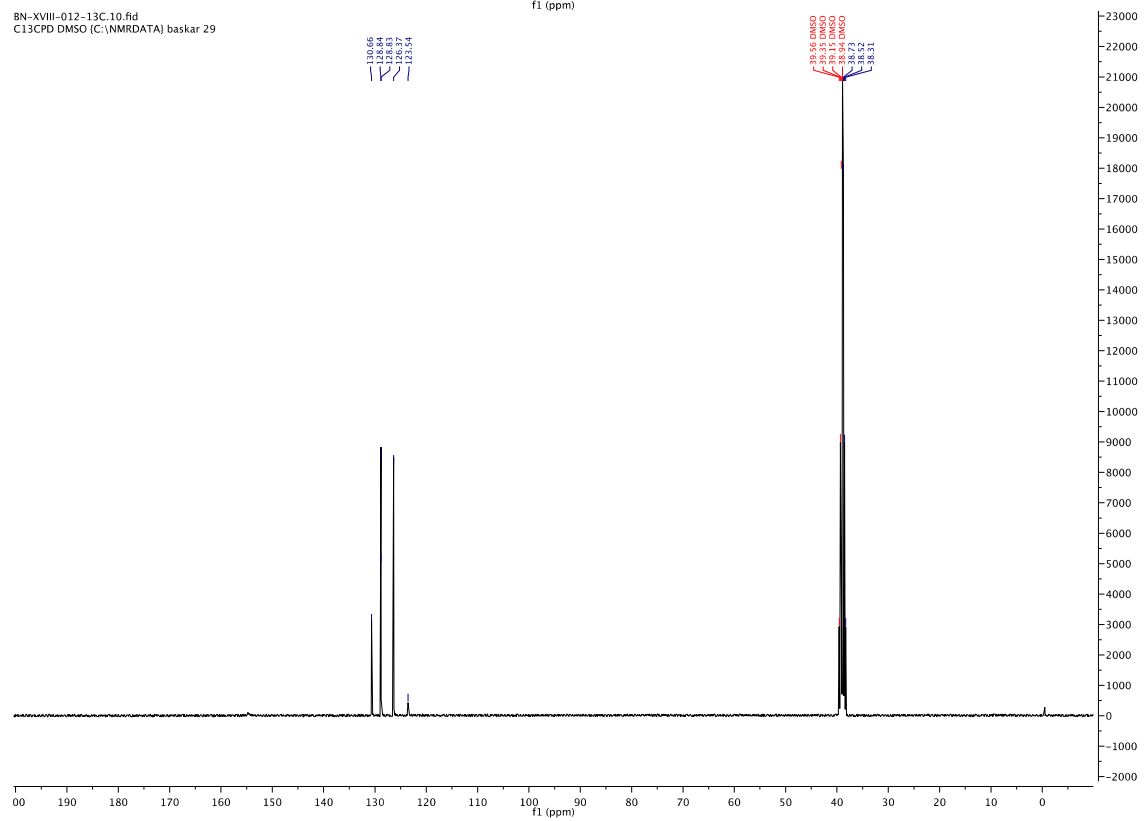

# 5-(4-Methylphenyl)-1H-tetrazole (2g)

BN-XVII-020-1H.10.fid  
PROTON DMSO [C:\NMRDATA] subhas 13

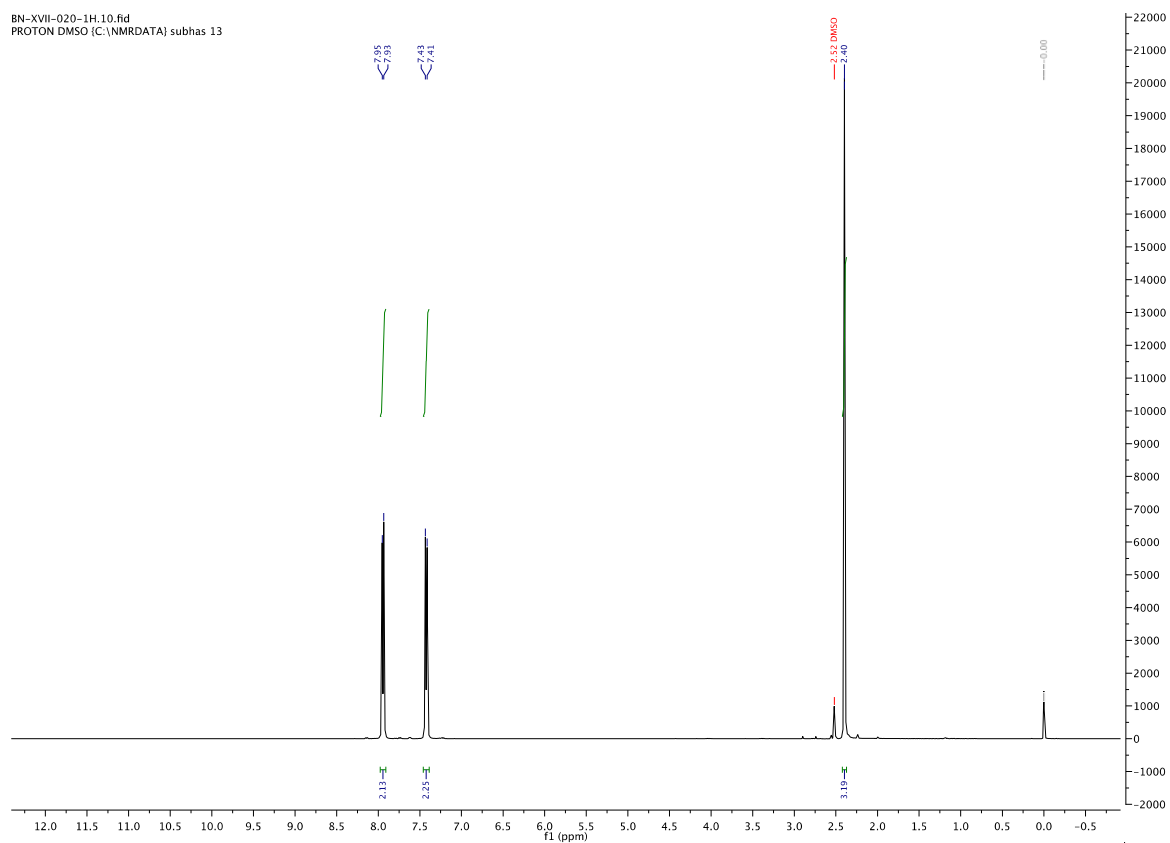

BN-XVII-020-13C.10.fid  
C13CPD DMSO [C:\NMRDATA] subhas 13

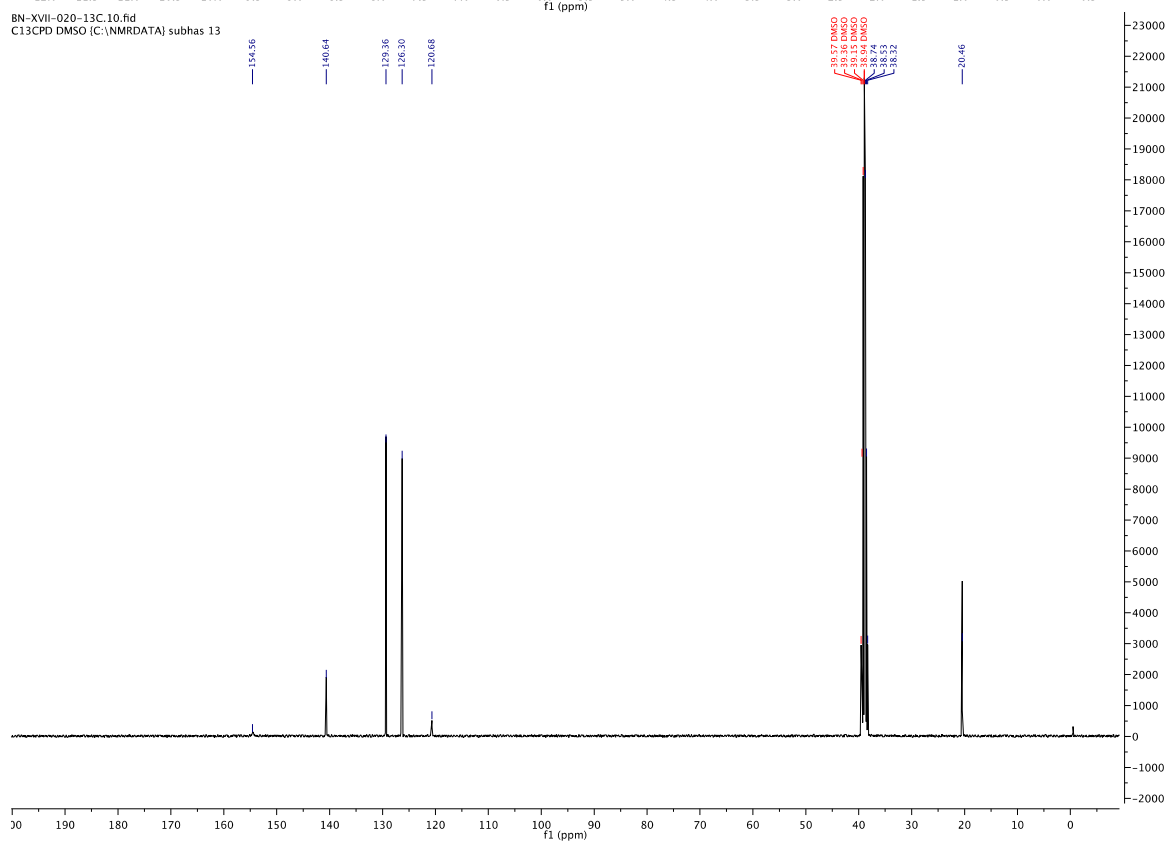

# 5-(2-Methylphenyl)-1H-tetrazole (2h)

BN-XVIII-010-1H.10.fid  
PROTON DMSO [C:\NMRDATA] subhas 32

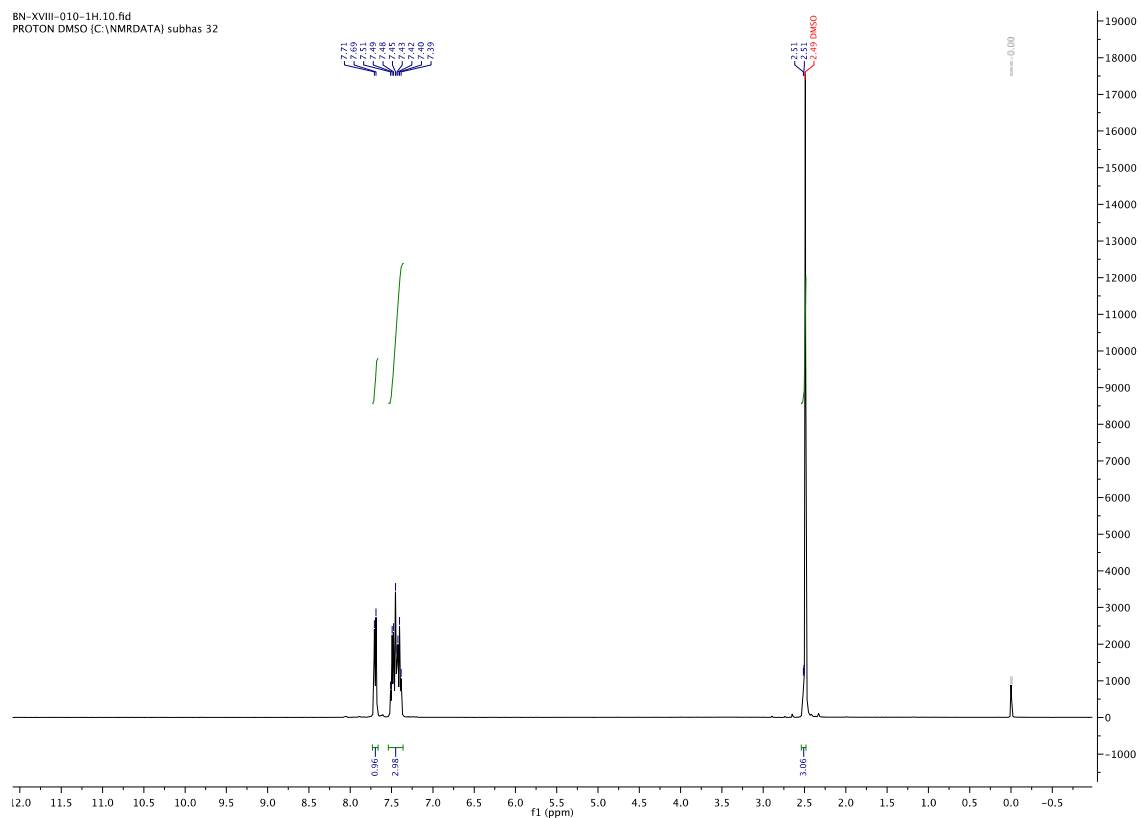

BN-XVII-010-13C.10.fid  
C13CPD DMSO [C:\NMRDATA] baskar 51

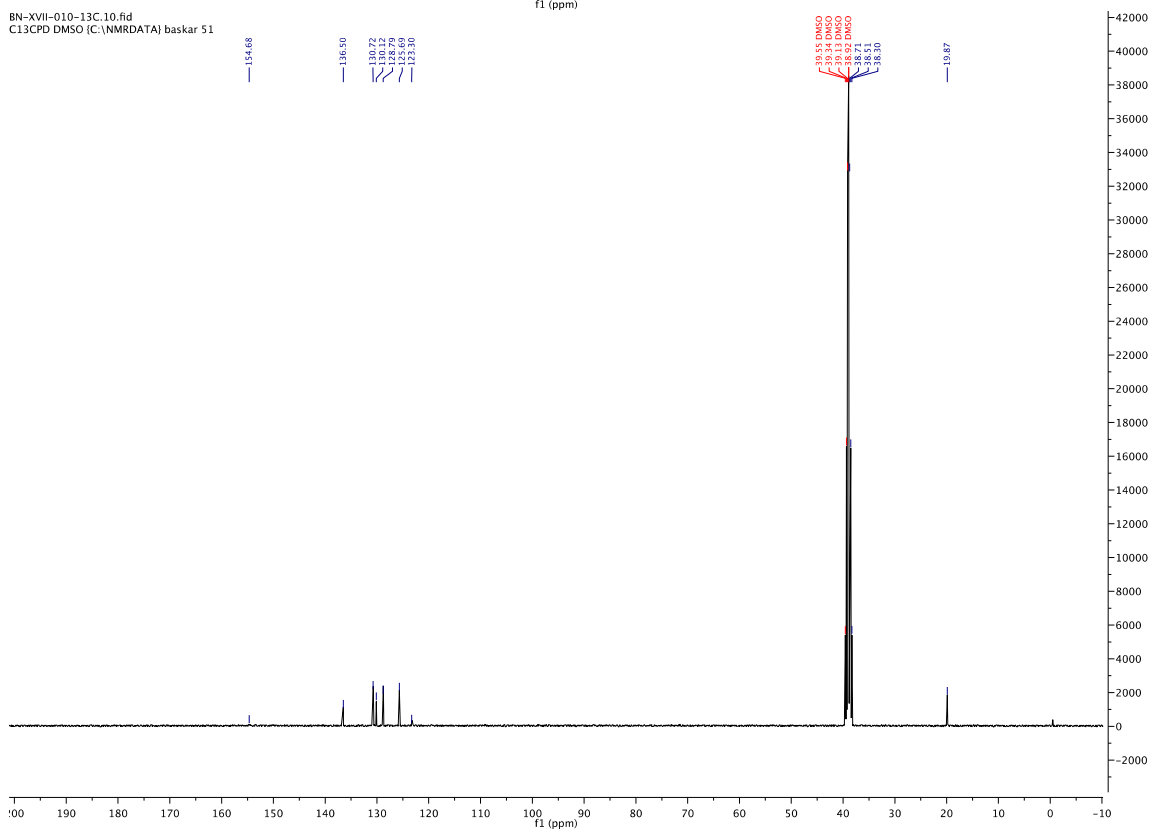



# 5-(4-Methoxyphenyl)-1H-tetrazole (2i)

BN-XVII-015-1H.10.fid  
PROTON DMSO [C:\NMRDATA\} subhas 42

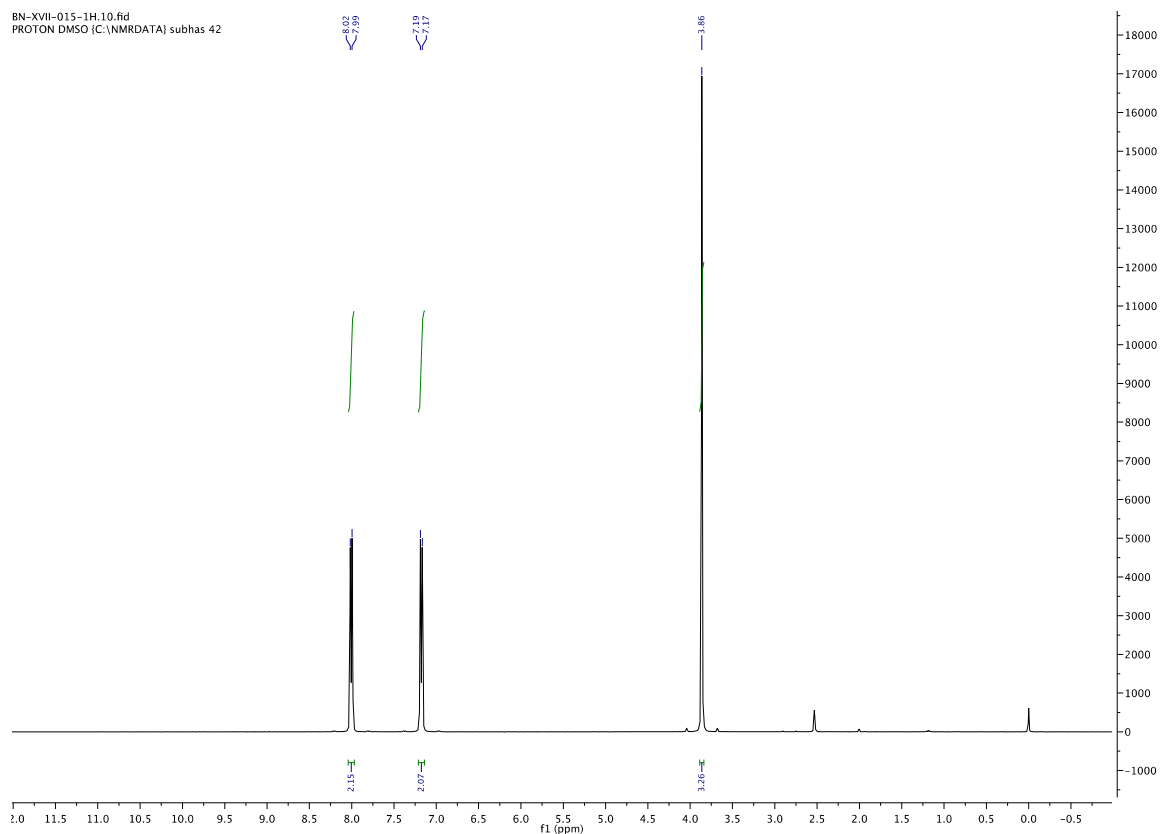

BN-XVII-015-13C.10.fid  
C13CPD DMSO [C:\NMRDATA\} subhas 42

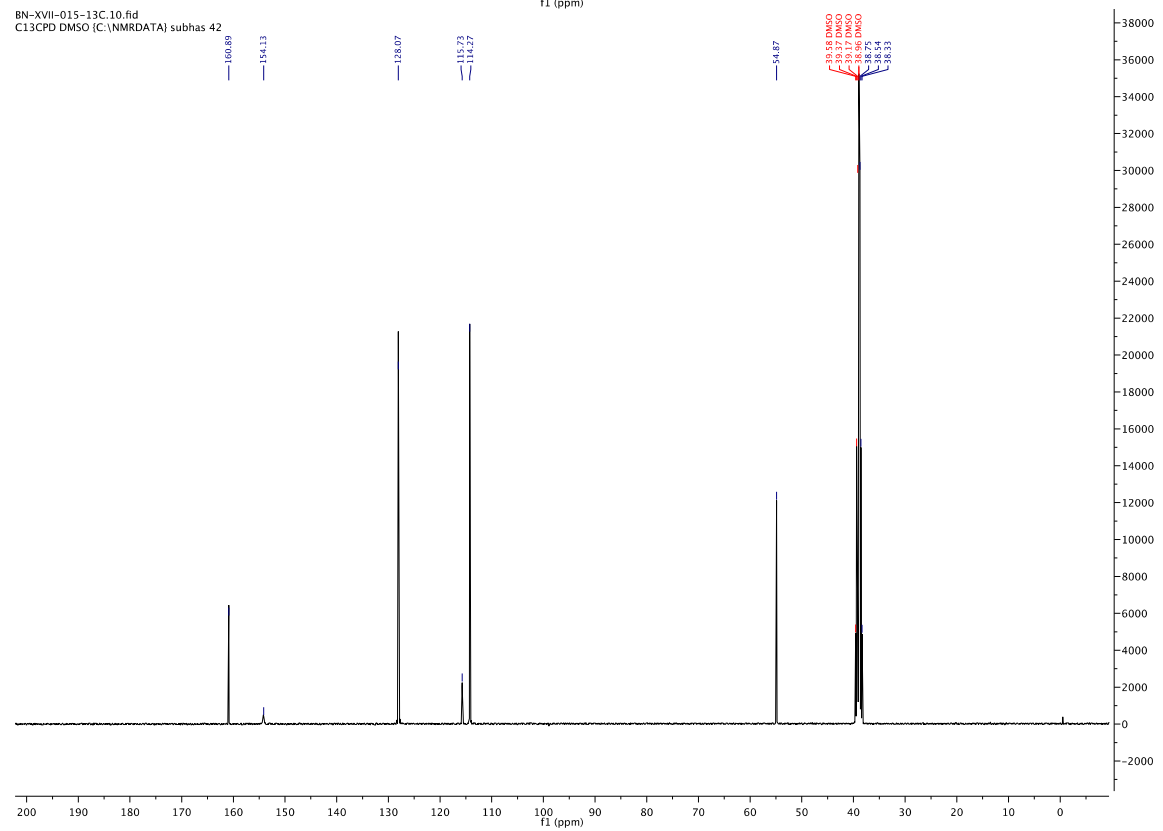

# 5-(4-Nitrophenyl)-1H-tetrazole (2j)

BN-XVII-019-1H.10.fid  
PROTON DMSO [C:\NMRDATA] baskar 48

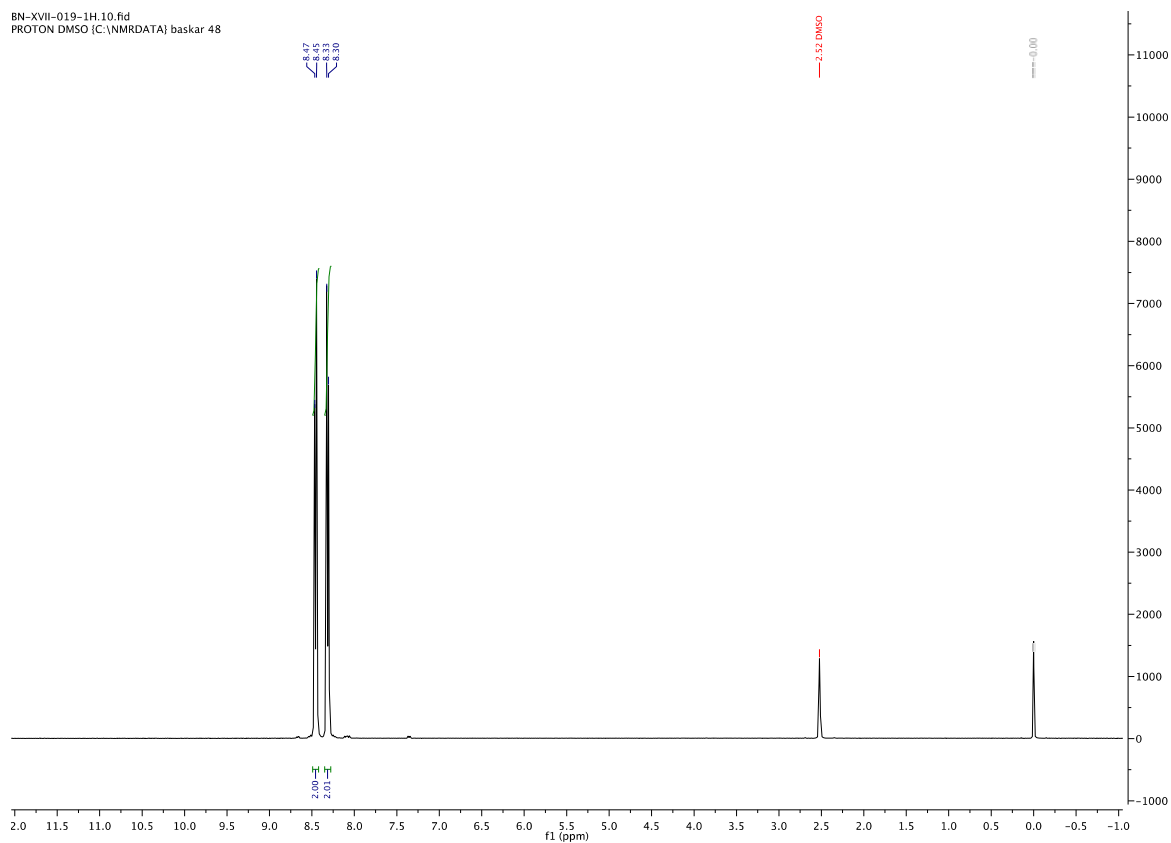

BN-XVII-019-13C.10.fid  
C13CPD DMSO [C:\NMRDATA] baskar 48

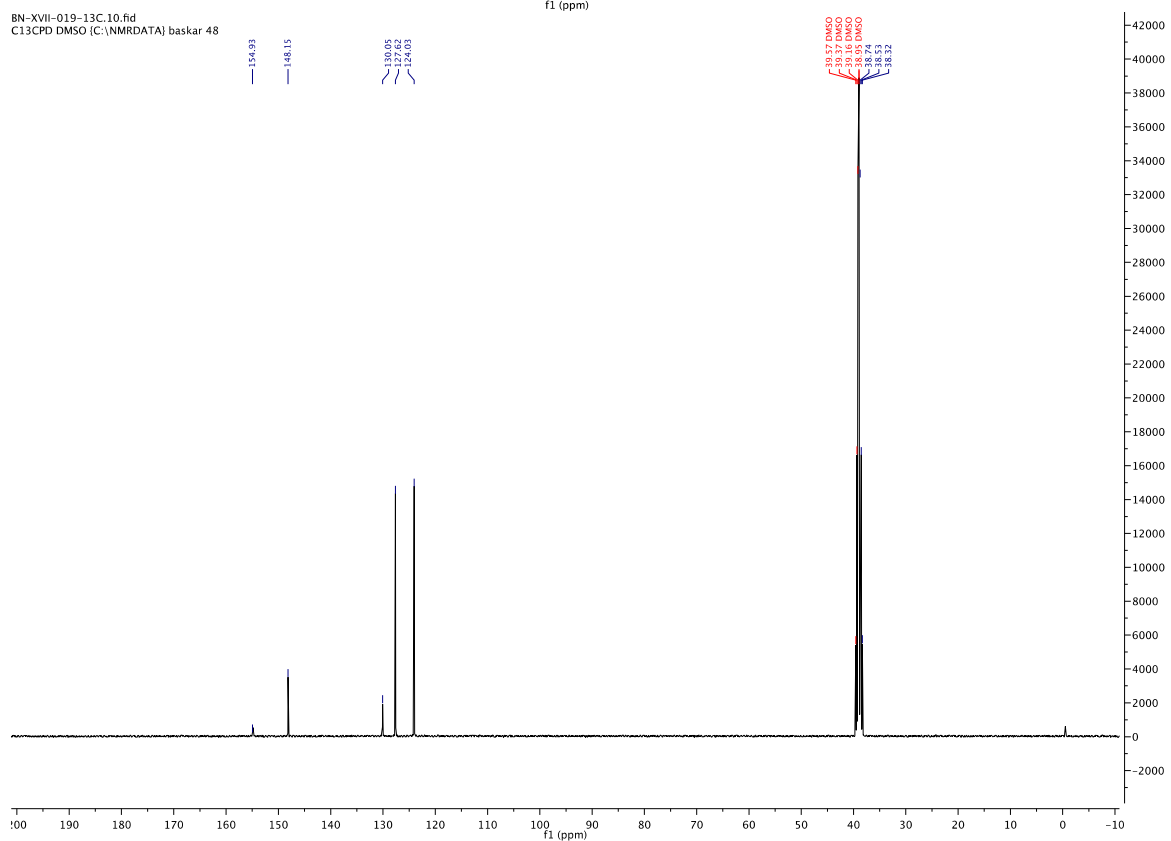

# 5-(3-Nitrophenyl)-1H-tetrazole (2k)

BN-XVII-013-1H.20.fid  
PROTON DMSO (C:\NMRDATA) baskar 31

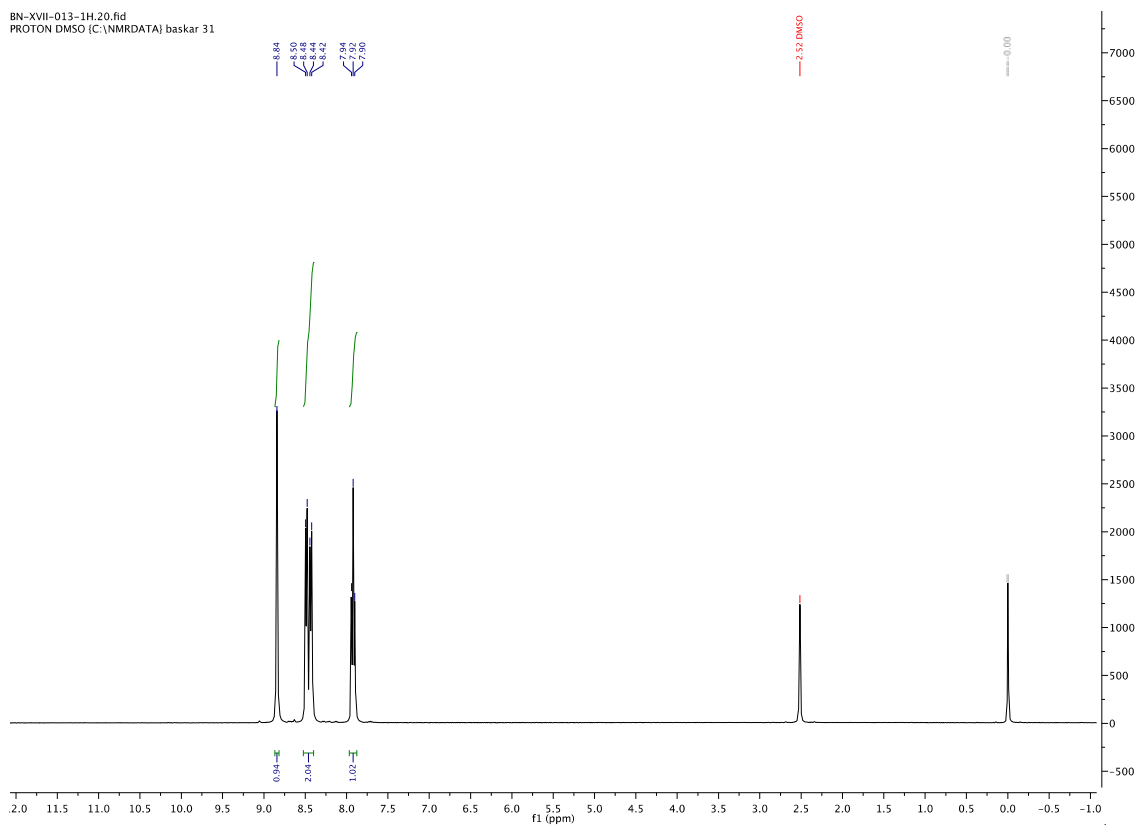

BN-XVII-013-13C.20.fid  
C13CPD DMSO (C:\NMRDATA) baskar 31

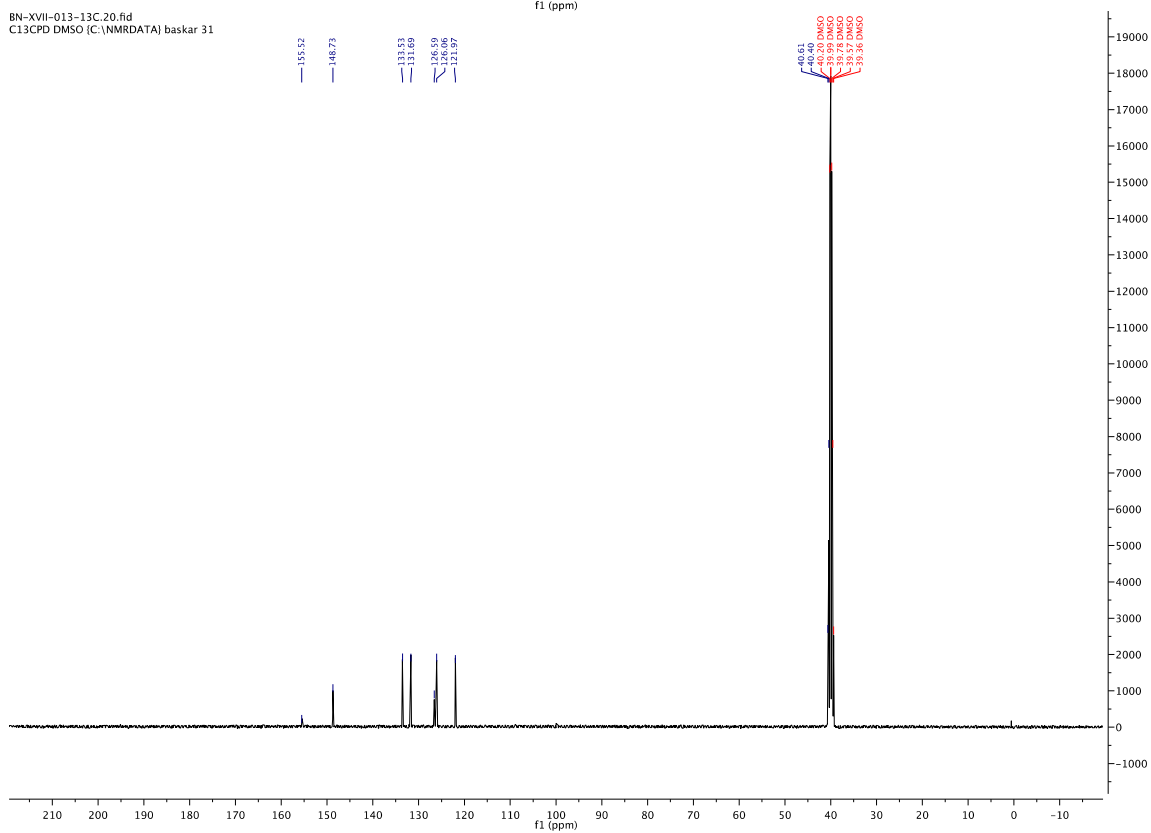

# 5-(4-Chlorophenyl)-1H-tetrazole (21)

BN-XVII-016-1H.10.fid  
PROTON DMSO [C:\NMRDATA\} baskar 23

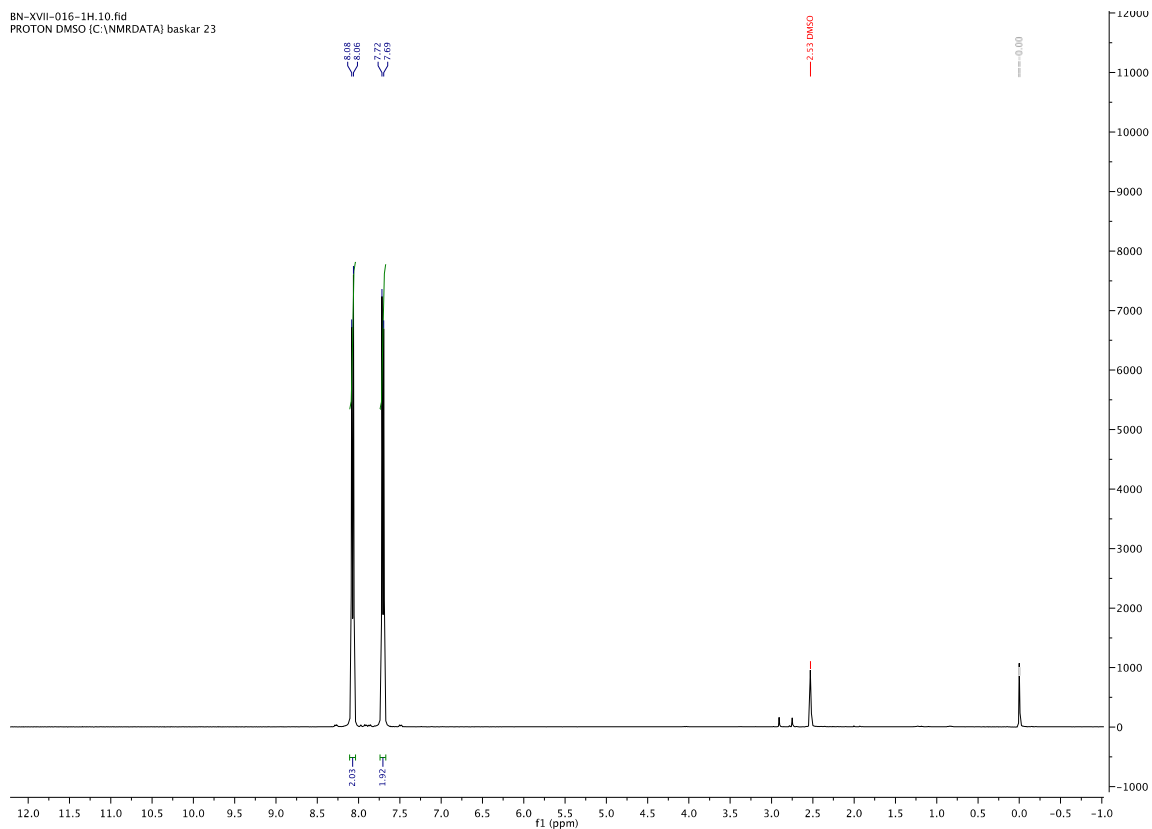

BN-XVII-016-13C.10.fid  
C13CPD DMSO [C:\NMRDATA\} baskar 23

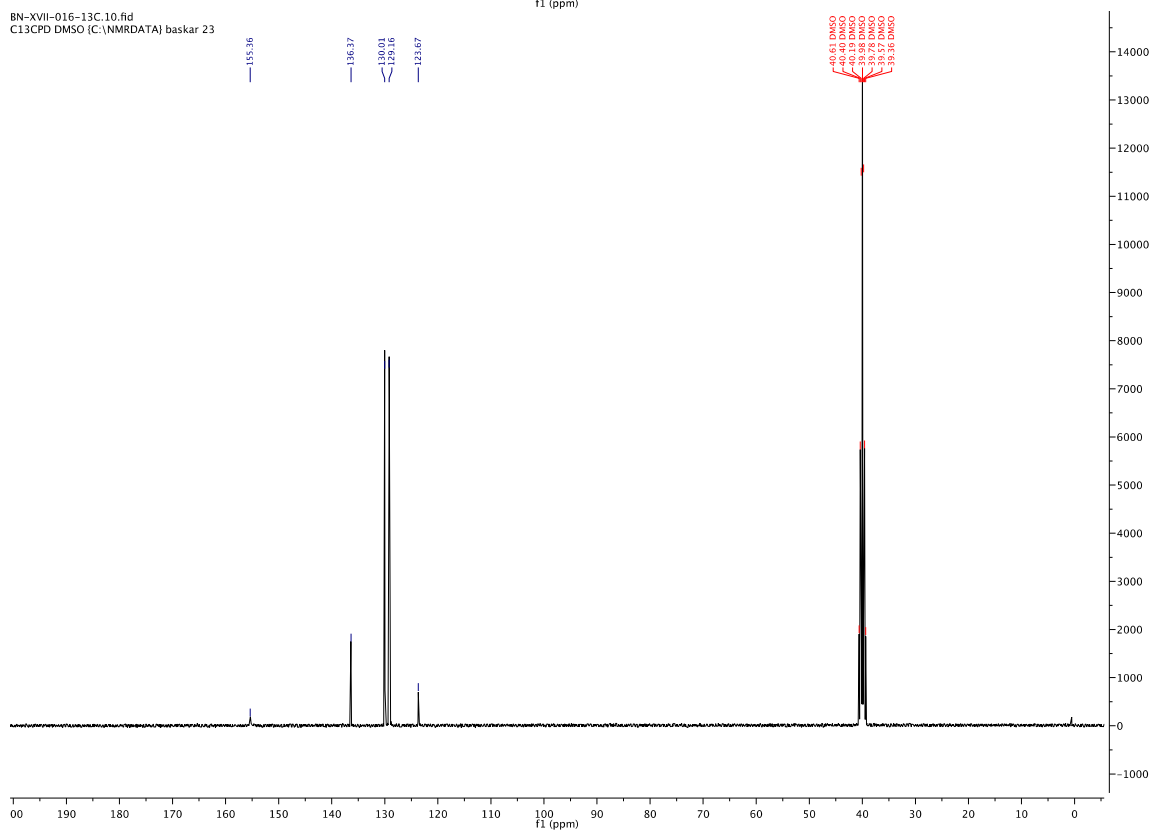

# 5-(4-Fluorophenyl)-1H-tetrazole (2m)

BN-XVIII-011-1H.10.fid  
PROTON DMSO (C:\NMRDATA) subhas 40

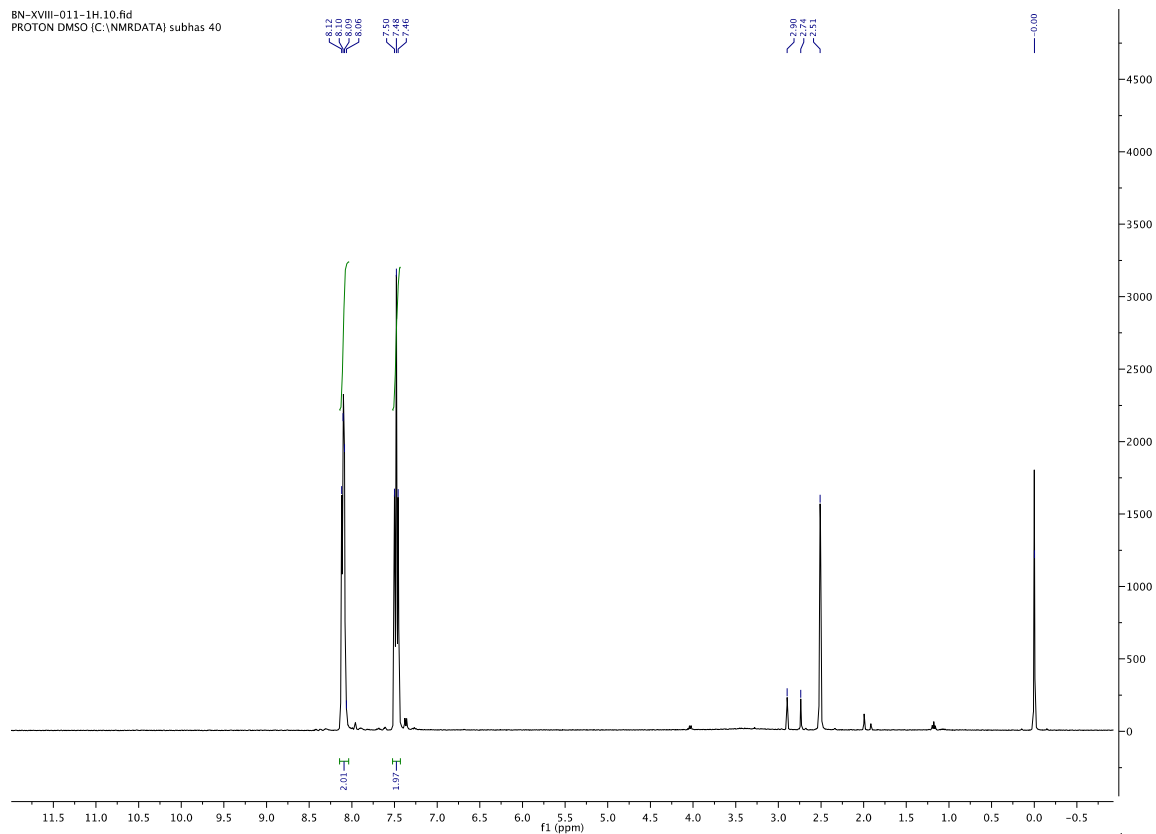

BN-XVIII-011-13C.10.fid  
C13CPD DMSO (C:\NMRDATA) subhas 40

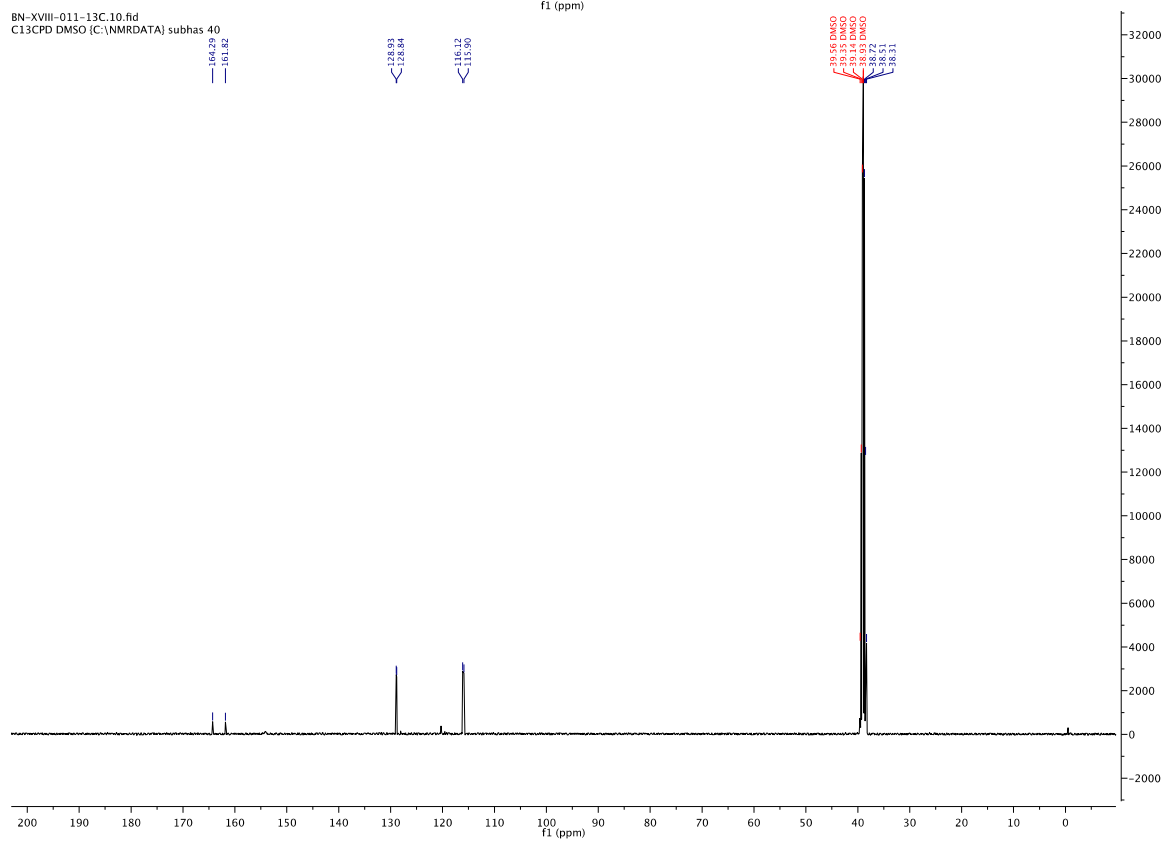

# 5-Diphenylmethyl-1H-tetrazole (2n)

BN-XVIII-07-1H.10.fid  
PROTON DMSO (C:\NMRDATA) baskar 24

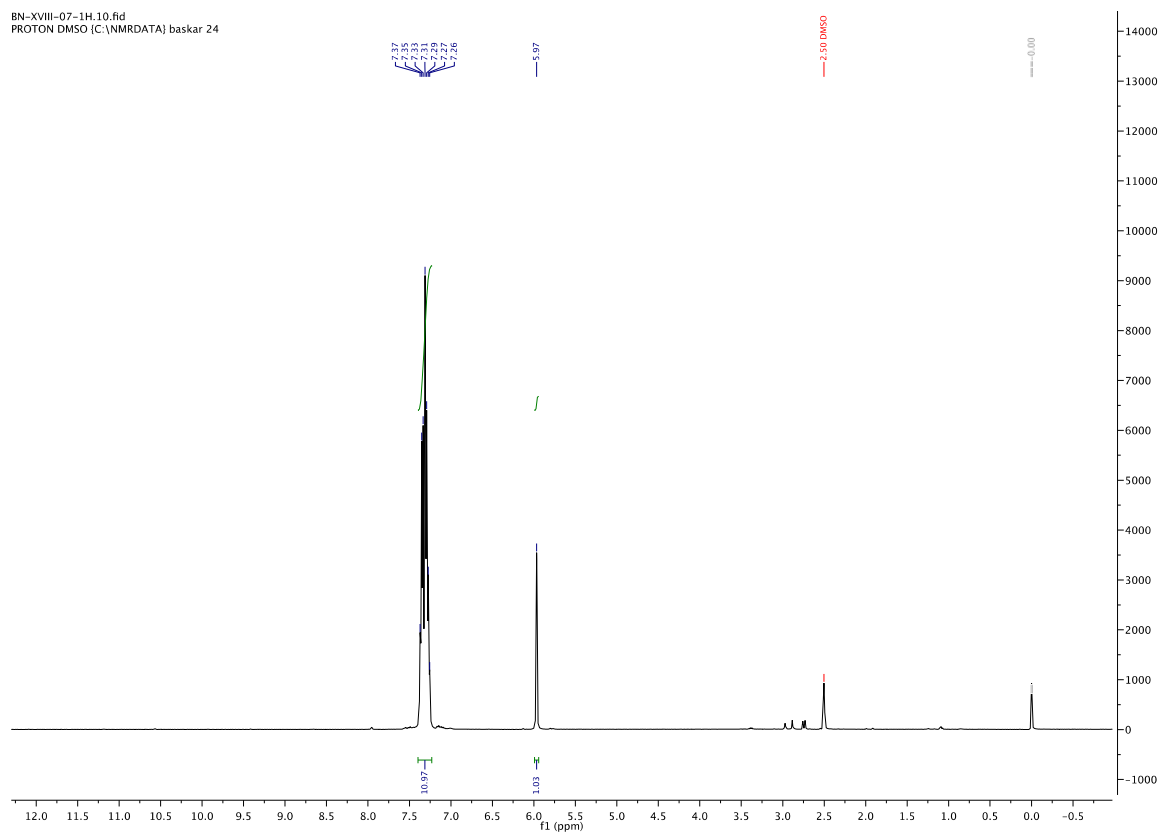

BN-XVIII-07-13C.10.fid  
C13CPD DMSO (C:\NMRDATA) baskar 24

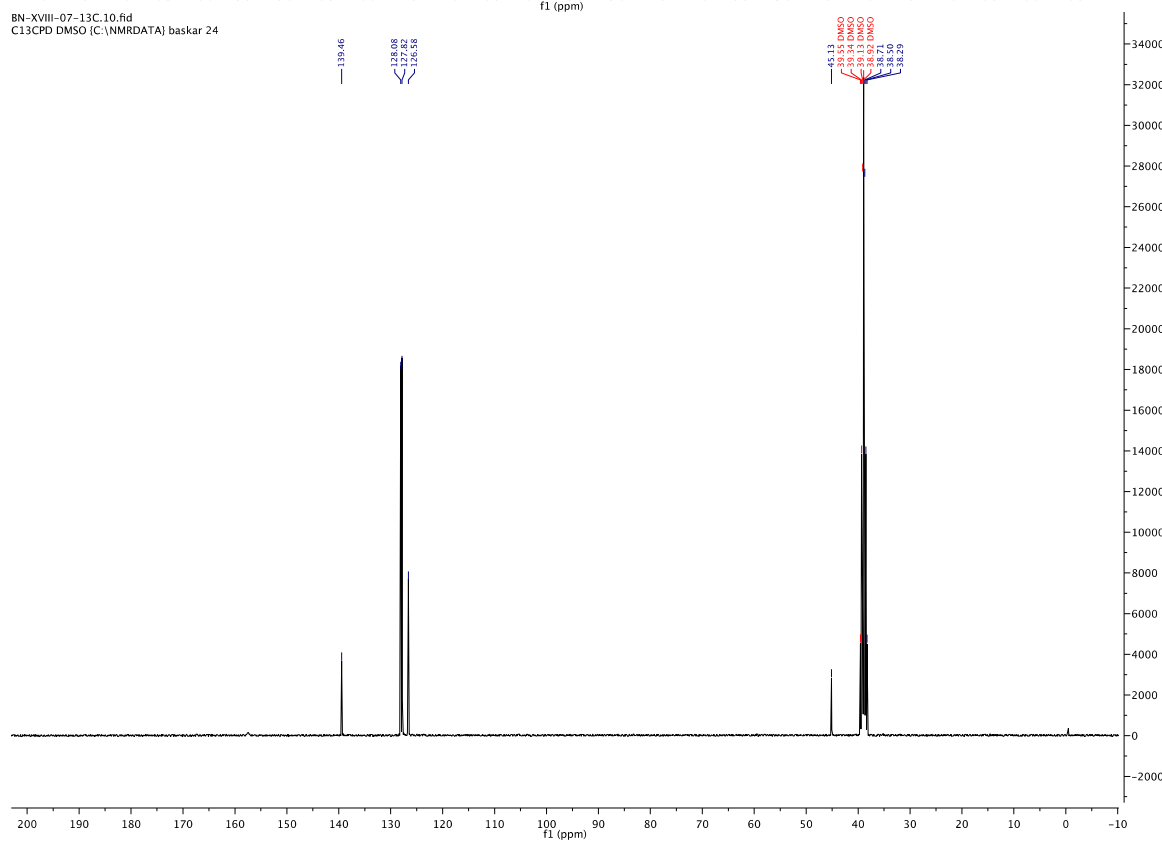

# 5-(4-Heptylphenyl)-1H-tetrazole (2o)

BN-XVIII-08-1H.10.fid  
 PROTON DMSO [C:\NMRDATA} baskar 25

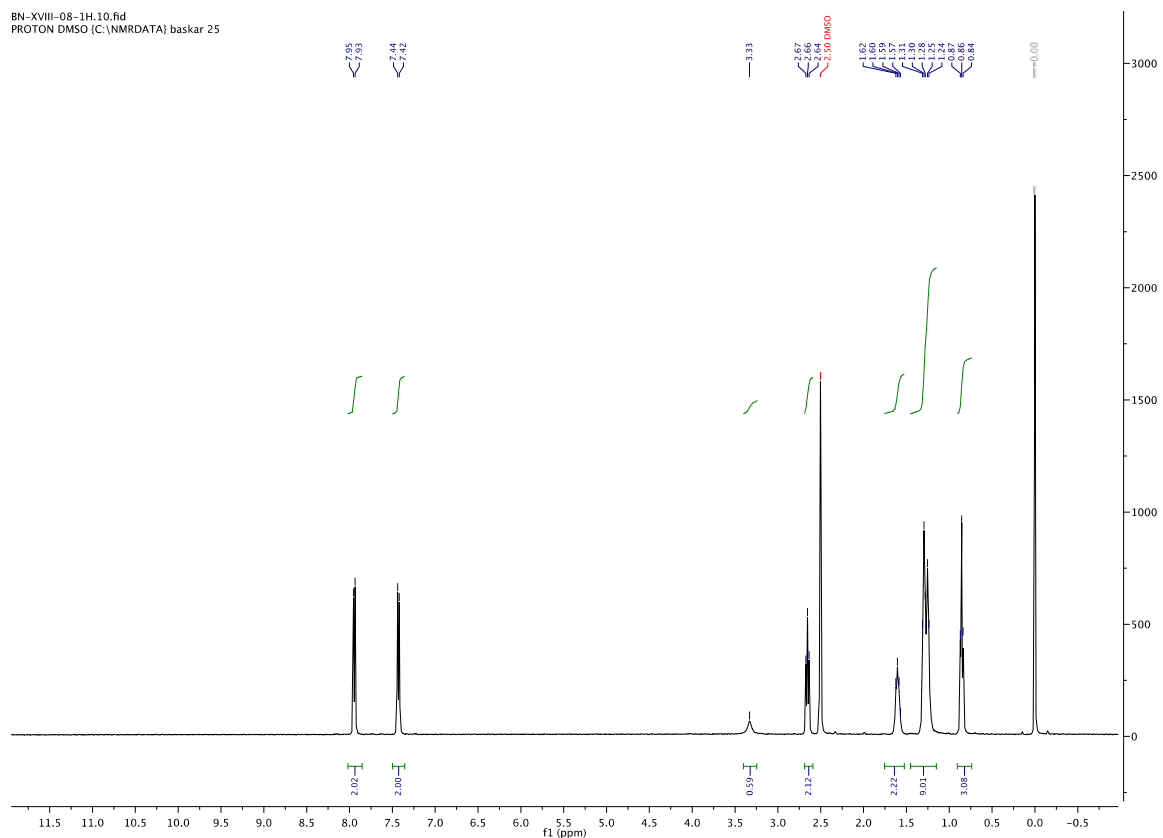

BN-XVIII-08-13C.12.fid  
 C13CPD DMSO [C:\NMRDATA} baskar 25

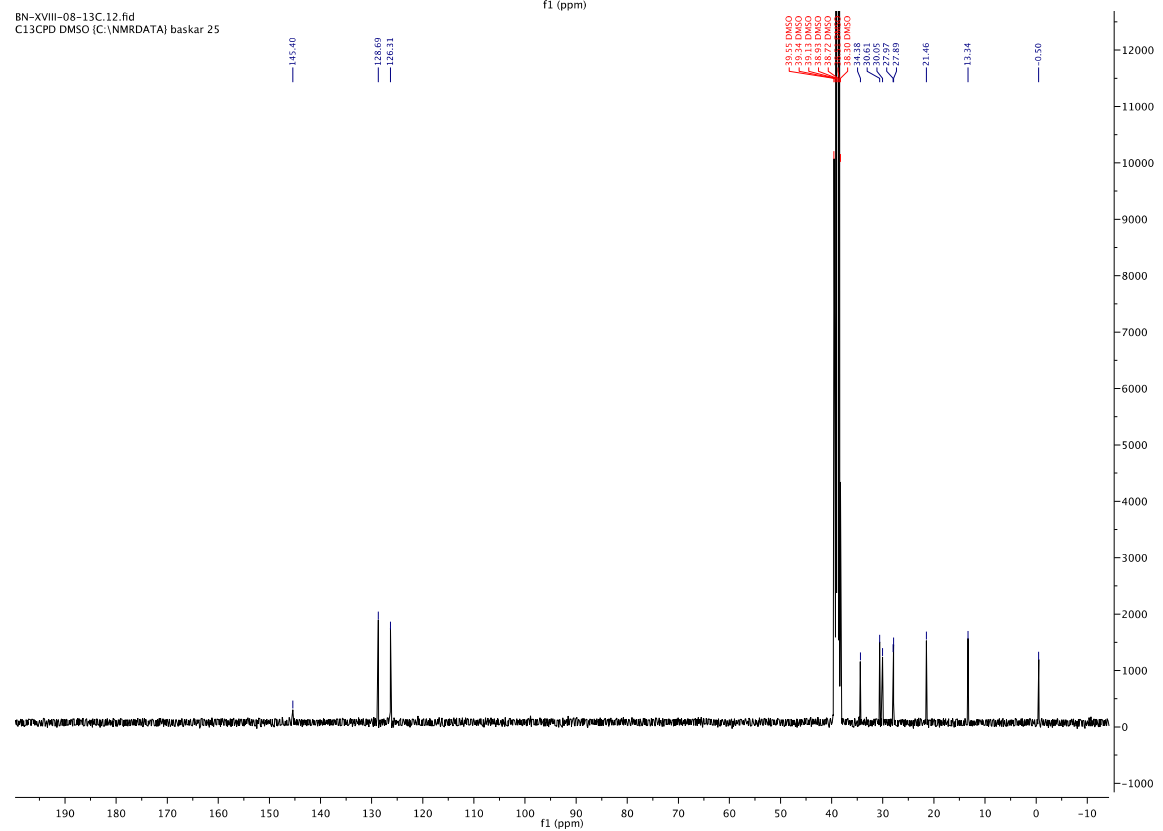

# 5-[4-(3-Butenyl)phenyl]-1H-tetrazole (2p)

BN-XVIII-09-1H.10.fid  
PROTON DMSO (C:\NMRDATA) baskar 28

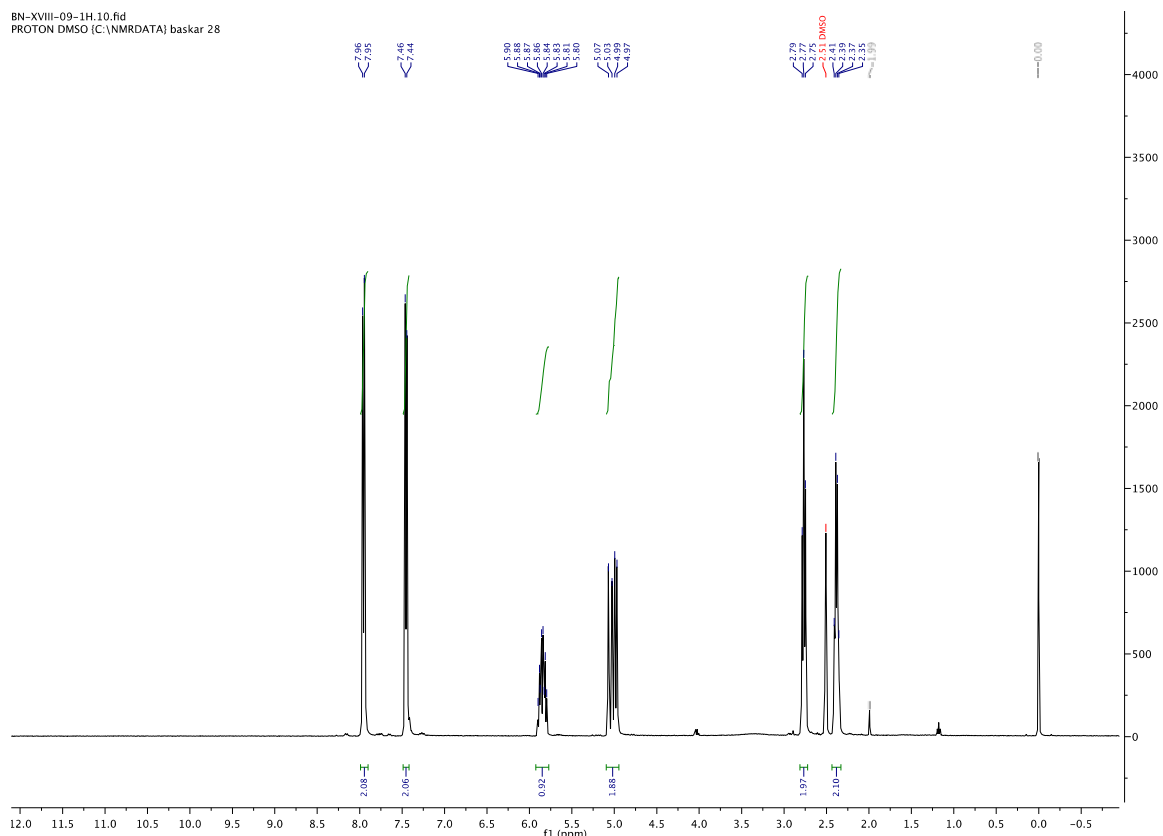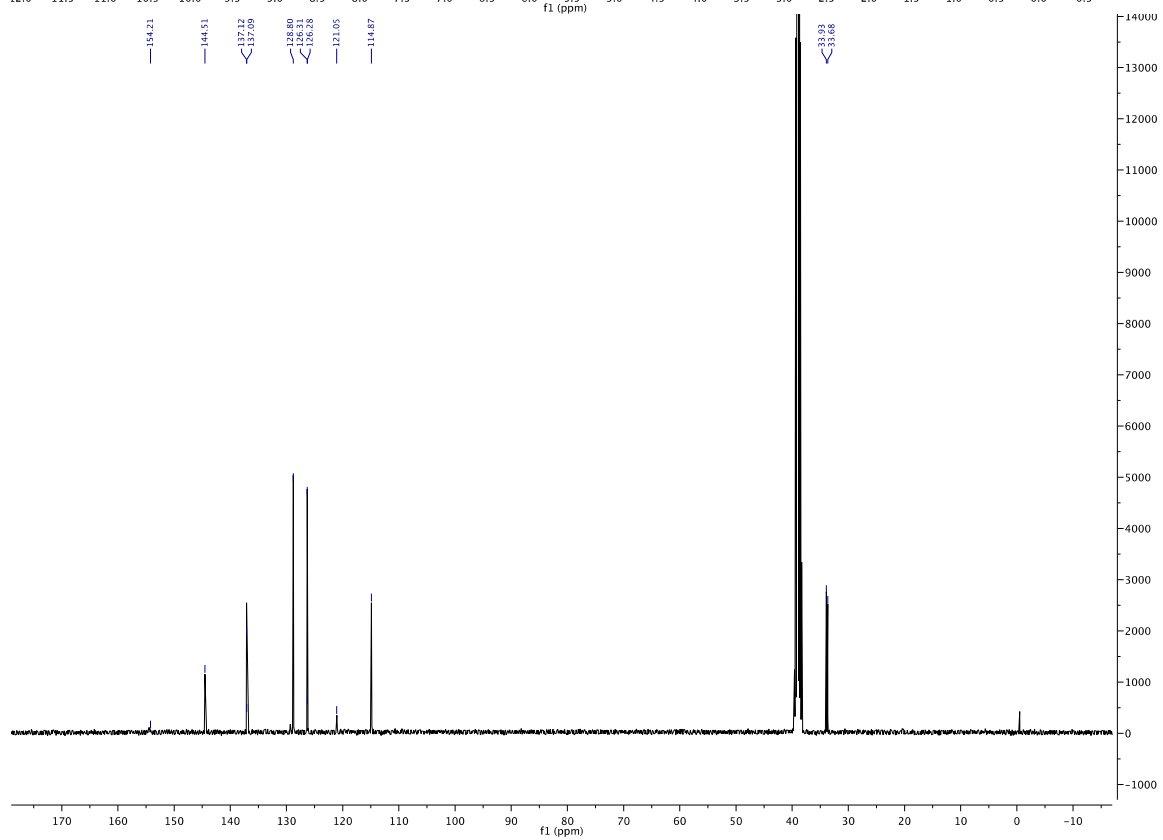

Supplement: s001 [file molecules-20-19881-s001.pdf]
